# Supplementary material
Source: PubMed Central journal article supplement (PMC6093230)
Supplement: supp_RA118.002125_135594_2_supp_154870_pfdfpf.pdf [file supp_RA118.002125_135594_2_supp_154870_pfdfpf.pdf]

## **SUPPORTING INFORMATION**

Heme bioavailability and signaling in response to stress in yeast cells

David A. Hanna, Rebecca Hu, Hyojung Kim, Osiris Martinez-Guzman, Matthew P. Torres, and Amit R.

Reddi

1. SUPPORTING FIGURES

2. SUPPORTING TABLES

2. SUPPORTING REFERENCES

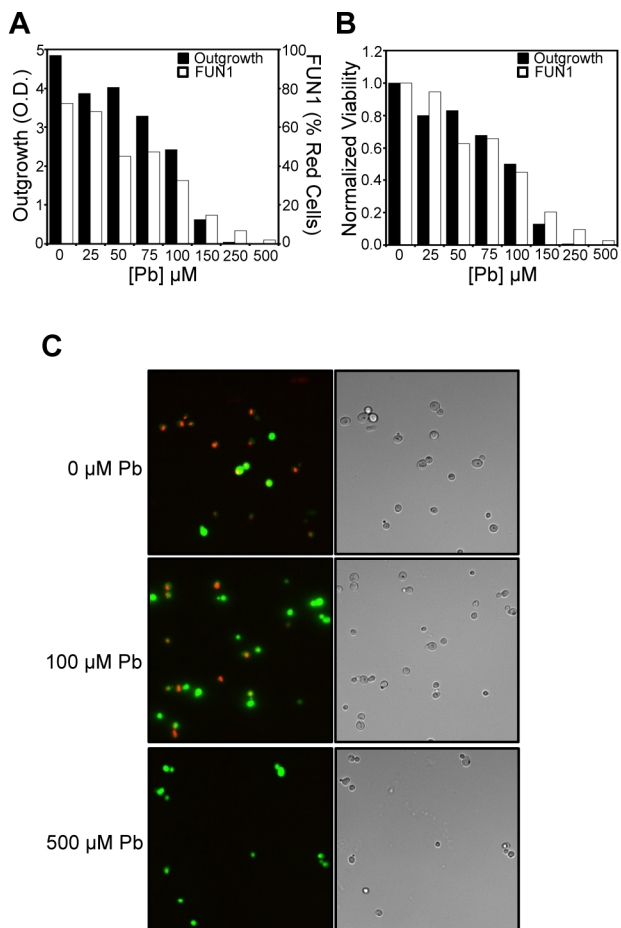

**Fig. S1.** Correlation between yeast cell viability as scored by outgrowth and a dye, FUN-1, that is sensitive to metabolic activity. **(A)** Outgrowth and FUN-1 measured viability was plotted as a function of [Pb] without normalization. Cell viability using FUN-1 was measured by taking the fraction of cells exhibiting red punctate fluorescence of the dye, which is indicative of metabolically active cells, and dividing over the total number of fluorescence positive cells that displayed either red punctate fluorescence or diffuse green fluorescence, which is indicative of metabolically inactive cells. **(B)** The data in **A** was normalized to the outgrowth or FUN-1 based viability at 0  $\mu\text{M}$  [Pb]. These data are representative of two independent trials.

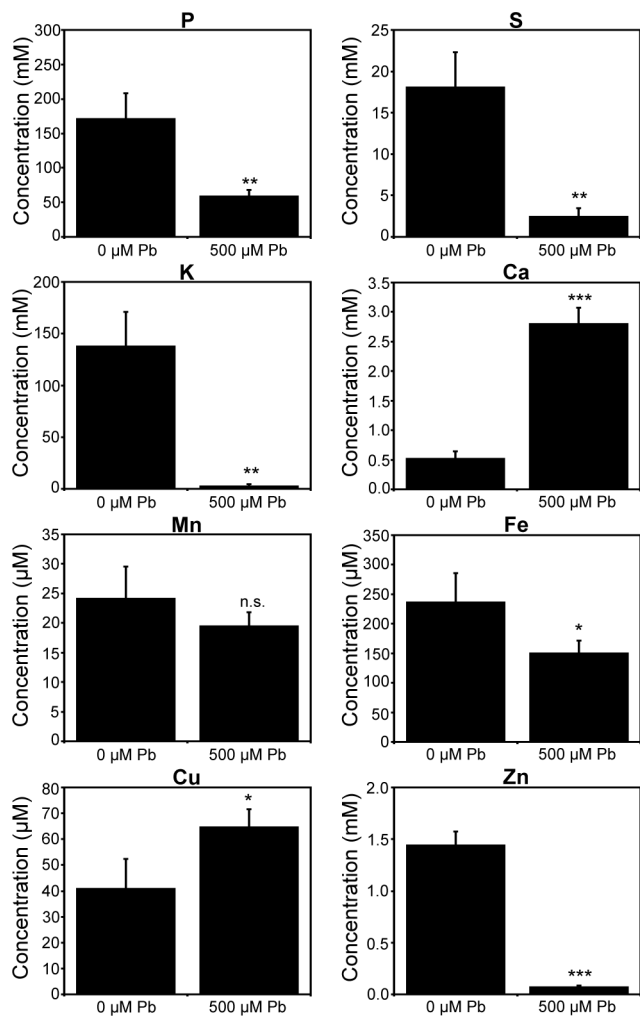

**Fig. S2.** Elemental analysis of  $Pb^{2+}$  treated cells from **Fig. 3**. All data represent the mean  $\pm$  SD of triplicate cultures and statistical significance was assessed using a two-sample t-test. Black asterisks represent the statistical significance between the treated and untreated samples. \*  $P < 0.05$ , \*\*  $P < 0.005$ , \*\*\*  $P < 0.0005$ , n.s. not significant.

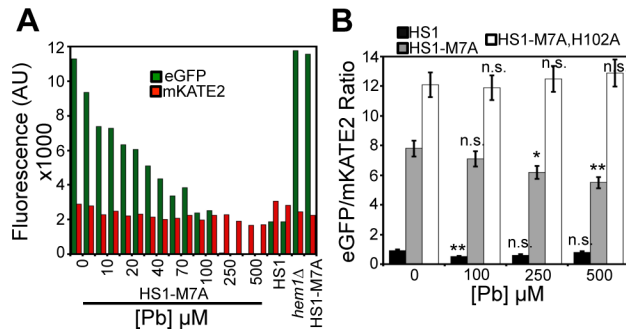

**Fig. S3.** The  $\text{Pb}^{2+}$ -dependent changes in heme sensor fluorescence ratios are not due to degradation of sensor and are heme dependent. **(A)** The eGFP (ex. 488 nm, em. 510 nm) and mKATE2 (ex. 588 nm, em. 620 nm) fluorescence channels that give rise to the HS1-M7A eGFP/mKATE2 ratios depicted in **Fig. S2A**. The relatively constant mKATE2 fluorescence emission across a wide array of  $\text{Pb}^{2+}$  doses indicates that sensor expression is stable. **(B)** A sensor variant that cannot bind heme, HS1-M7A, H102A, does not exhibit  $\text{Pb}^{2+}$ -dependent changes in eGFP/mKATE2 fluorescence ratio relative to the heme sensor, HS1-M7A. This suggests that the change in sensor fluorescence emission is due to heme and not  $\text{Pb}^{2+}$ -dependent, heme-independent changes in sensor fluorescence. All data represent the mean  $\pm$  SD of triplicate cultures and statistical significance was assessed using a two-sample t-test. These data support

**Fig. 4.** Black asterisks represent the statistical significance between the treated and untreated samples. \*  $P < 0.05$ , \*\*  $P < 0.01$ , n.s. not significant.

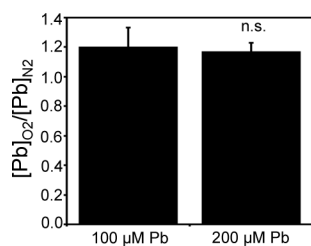

**Fig. S4.** Anaerobic and aerobic  $Pb^{2+}$  uptake are virtually identical. Intracellular Pb was measured by TXRF after treatment with a bolus of 100  $\mu$ M or 200  $\mu$ M  $Pb(NO_3)_2$  that was administered either anaerobically ( $N_2$ ) or aerobically ( $O_2$ ) as described in the “Experimental Model and Subject Details”. The data are presented as a ratio of aerobic ( $O_2$ ) to anaerobic ( $N_2$ ) cellular  $Pb^{2+}$  concentrations and represent the mean  $\pm$  SD of triplicate cultures. The statistical significance was assessed using a two-sample t-test. These data support **Fig. 6**. n.s. not significant.

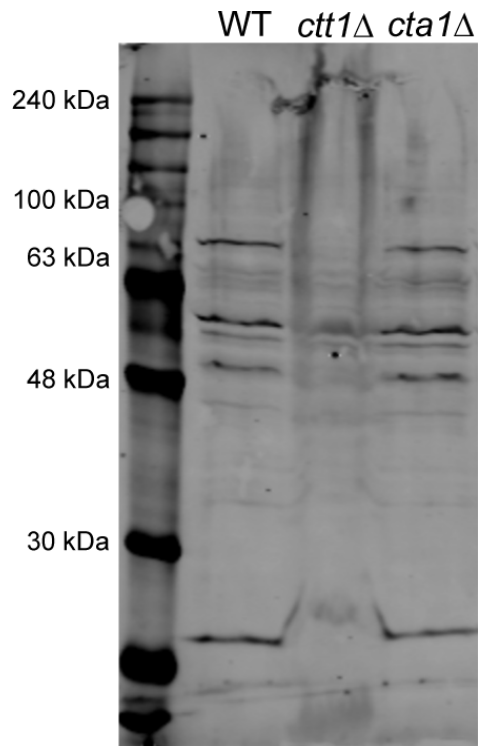

**Fig. S5.** Validation of the  $\alpha$ -Ctt1 antibody. Yeast cytosolic catalase, Ctt1, was probed using a custom antibody generated by Genscript's custom antibody service (Poly Express Premium Service, SC1676). The  $\alpha$ -Ctt1 antibody was raised in rabbit against a 1-320 amino acid fragment of Ctt1. The  $\alpha$ -Ctt1 antibody was validated in yeast by comparing immunoreactivity between WT, *ctt1*Δ, and *cta1*Δ cells, the latter being a deletion mutant of a peroxisomal/mitochondrial catalase, Cta1, unrelated to Ctt1. All gels were imaged on a LiCOR Odyssey Infrared imager. The expected molecular weight of monomeric Ctt1 is ~64.5 kDa, which is consistent with the highest molecular weight band present in WT and *cta1*Δ cells, but not *ctt1*Δ cells. This antibody was utilized in **Fig. 8B**.

**Table S1.** List of plasmids.

| <b>Name</b>       | <b>Description</b>                                                   | <b>Source</b> |
|-------------------|----------------------------------------------------------------------|---------------|
| p415- <i>GPD</i>  | pRS415 containing the <i>GPD</i> promoter                            | (2)           |
| p415- <i>CYCI</i> | pRS415 containing the <i>CYCI</i> promoter                           | (2)           |
| p316- <i>GALI</i> | pRS316 containing the <i>GALI</i> promoter                           | (3)           |
| pDH013            | HS1 heme sensor subcloned into p415- <i>GPD</i>                      | (4)           |
| pRH021            | HS1-M7A heme sensor subcloned into p415- <i>GPD</i>                  | (4)           |
| pJA010            | HS1-M7A,H102A heme sensor sub-cloned into p415- <i>GPD</i>           | (4)           |
| pRH003            | eGFP sub-cloned into p415- <i>GPD</i>                                | (4)           |
| pOM003            | eGFP sub-cloned into p415- <i>CYCI</i>                               | (4)           |
| pDH039            | Cytochrome <i>b</i> <sub>562</sub> sub-cloned into p316- <i>GALI</i> | This study    |

**Table S2.** Mass spectrometry-based protein identification of enolase and GAPDH from the SDS-PAGE gel depicted in **Fig. 7**.

| <b>Gel Band</b> | <b>#</b> | <b>Accession</b> | <b>Symbol</b> | <b>% Coverage</b> | <b># Peptides</b> | <b>PSMs</b> | <b>MW [kDa]</b> | <b>Score Sequest HT</b> |
|-----------------|----------|------------------|---------------|-------------------|-------------------|-------------|-----------------|-------------------------|
| Upper           | 1        | YHR174W          | ENO2          | 65.68             | 19                | 381         | 46.89           | 1154.83                 |
|                 | 2        | YGR254W          | ENO1          | 60.87             | 17                | 170         | 46.79           | 517.04                  |
| Lower           | 1        | YGR192C          | TDH3          | 43.67             | 9                 | 111         | 35.72           | 357.34                  |
|                 | 2        | YJR009C          | TDH2          | 39.76             | 10                | 106         | 35.82           | 334.19                  |
|                 | 3        | YJL052W          | TDH1          | 46.99             | 12                | 77          | 35.73           | 254.91                  |



## SUPPLEMENTAL REFERENCES

1. Wissbrock, A., and Imhof, D. (2017) A Tough Nut to Crack: Intracellular Detection and Quantification of Heme in Malaria Parasites by a Genetically Encoded Protein Sensor. *Chembiochem* **18**, 1561-1564
2. Mumberg, D., Muller, R., and Funk, M. (1995) Yeast vectors for the controlled expression of heterologous proteins in different genetic backgrounds. *Gene* **156**, 119-122
3. Kiktev, D. A., Patterson, J. C., Muller, S., Bariar, B., Pan, T., and Chernoff, Y. O. (2012) Regulation of chaperone effects on a yeast prion by cochaperone Sgt2. *Mol Cell Biol* **32**, 4960-4970
4. Hanna, D. A., Harvey, R. M., Martinez-Guzman, O., Yuan, X., Chandrasekharan, B., Raju, G., Outten, F. W., Hamza, I., and Reddi, A. R. (2016) Heme dynamics and trafficking factors revealed by genetically encoded fluorescent heme sensors. *Proc Natl Acad Sci USA* **113**, 7539-7544
